# Supplementary material for: Impact of homologous and heterologous boosters in neutralizing antibodies titers against SARS-CoV-2 Omicron in solid-organ transplant recipients
Source: Front Immunol. 2023 Mar 13;14:1135478. doi: 10.3389/fimmu.2023.1135478 (PMC10044136; doi:10.3389/fimmu.2023.1135478)
Supplement: Supplementary file 5 [file Table_1.xlsx]

## Sheet: Data
						2X_inital_scheme												First Booster BNT162b2													Second Booster BNT162b2
Group	Age	Sex	Transplanted_organ	Vaccine_initial_scheme	Internal_code_90days	pVNT50_D614G	CI 95%_D614G	R2_D614G	pVNT50_BA.1	CI 95%_BA.1	R2_BA.1	ELISA_N	ELISA_N	ELISA_S	ELISA_S	OnSite_IgM/IgG		Internal_code_1st_booster	pVNT50_D614G	CI 95%_D614G	R2_D614G	pVNT50_BA,1	CI 95%_BA.1	R2_BA.1	ELISA_N	ELISA_N	ELISA_S	ELISA_S	OnSite_IgM/IgG		Internal_code_2nd_booster	pVNT50_D614G	CI 95%_D614G	R2_D614G	pVNT50_BA,1	CI 95%_BA.1	R2_BA.1	ELISA_N	ELISA_N	ELISA_S	ELISA_S	OnSite_IgM/IgG
SOTR	59	M	kidney	BNT162b2	A01	10	ND	ND	10	ND	ND	0.074	Negative	0.4	Negative	Negative		-													-	-	-	-	-	-	-	-	-	-	-	-
SOTR	57	M	kidney	BNT162b2	A02	6076	5600 to 6580	0.9955	1183	1074 to 1307	0.9964	81.36	Positive	2500	Positive	Positive		F7	7548	7350 to 7766	0.9982	1180	1071 to 1299	0.9962	49.2	Positive	2500	Positive	Positive		B10	8565	8253 to 8897	0.9991	1076	1003 to 1156	0.9984	33.39	Positive	2500	Positive	Positive
SOTR	49	F	pancreas + kidney	CoronaVac	A03	10	ND	ND	10	ND	ND	0.075	Negative	0.4	Negative	Negative		E9	10	ND	ND	10	ND	ND	0.07	Negative	0.44	Negative	Negative		B8	10	ND	ND	10	ND	ND	0.079	Negative	0.763	Negative	Negative
SOTR	57	M	kidney	CoronaVac	A04	21.76	7.596 to 44.45	0.8374	14.99	7.414 to 23.55	0.8674	0.714	Negative	1.5	Positive	Positive		F8	722.5	670.3 to 779.4	0.9981	547.4	342.5 to 884.3	0.9249	0.25	Negative	2500	Positive	Positive		C7	3522	3299 to 3762	0.9984	551	478.5 to 637.4	0.9937	0.086	Negative	2500	Positive	Positive
SOTR	25	F	kidney	BNT162b2	A05	675.4	566.4 to 806.5	0.986	40.04	35.13 to 45.66	0.9933	0.079	Negative	471.6	Positive	Positive		-	-	-	-	-	-	-	-	-	-	-	-		-	-	-	-	-	-	-	-	-	-	-	-
SOTR	36	F	kidney	BNT162b2	A06	10	ND	ND	10	ND	ND	0.074	Negative	0.4	Negative	Negative		F2	10	ND	ND	10	ND	ND	0.075	Negative	7.45	Positive	Negative		A7	86.25	53.61 to 140.8	0.9036	10	ND	ND	0.083	Negative	234.3	Positive	Positive
SOTR	34	M	pancreas + kidney	BNT162b2	A07	103.6	70.31 to 152.7	0.935	62.17	30.41 to 112.5	0.8649	0.075	Negative	22.66	Positive	Negative		-	-	-	-	-	-	-	-	-	-	-	-		-	-	-	-	-	-	-	-	-	-	-	-
SOTR	35	F	kidney	BNT162b2	A08	10	ND	ND	10	ND	ND	0.081	Negative	2.28	Positive	Negative		-	-	-	-	-	-	-	-	-	-	-	-		B7	56.89	30.80 to 103.9	0.8439	10	ND	ND	0.082	Negative	193.7	Positive	Positive
SOTR	37	F	double-lung	BNT162b2	A09	10	ND	ND	10	ND	ND	0.07	Negative	0.4	Negative	Negative		E10	10	ND	ND	10	ND	ND	0.071	Negative	0.4	Negative	Negative		A8	10	ND	ND	10	ND	ND	1.22	Positive	7.98	Positive	Negative
SOTR	55	F	liver	CoronaVac	A10	37.3	24.63 to 54.28	0.9341	10	ND	ND	0.206	Negative	22.22	Positive	Negative		G7	5646	5371 to 5934	0.9984	1060	999.9 to 1126	0.9975	0.64	Negative	2500	Positive	Positive		A10	5178	5019 to 5341	0.9994	2140	1802 to 2546	0.9881	0.25	Negative	2500	Positive	Positive
SOTR	64	F	liver	CoronaVac	B01	10	ND	ND	10	ND	ND	0.085	Negative	0.4	Negative	Negative		-	-	-	-	-	-	-	-	-	-	-	-		-	-	-	-	-	-	-	-	-	-	-	-
SOTR	39	M	kidney	BNT162b2	B02	180.5	126.6 to 260.7	0.9485	10	ND	ND	0.073	Negative	199.1	Positive	Positive		-	-	-	-	-	-	-	-	-	-	-	-		-	-	-	-	-	-	-	-	-	-	-	-
SOTR	52	F	heart	BNT162b2	B03	10	ND	ND	10	ND	ND	0.073	Negative	0.4	Negative	Negative		-	-	-	-	-	-	-	-	-	-	-	-		-	-	-	-	-	-	-	-	-	-	-	-
SOTR	42	M	pancreas + kidney	CoronaVac	B04	10	ND	ND	10	ND	ND	0.088	Negative	0.4	Negative	Negative		G2	10	ND	ND	10	ND	ND	0.085	Negative	0.4	Negative	Negative		B5	10	ND	ND	10	ND	ND	0.091	Negative	0.4	Negative	Negative
SOTR	20	M	liver	BNT162b2	B05	10	ND	ND	10	ND	ND	0.075	Negative	0.4	Negative	Negative		F6	10	ND	ND	10	ND	ND	0.074	Negative	0.4	Negative	Negative		-	-	-	-	-	-	-	-	-	-	-	-
SOTR	33	F	pancreas + kidney	CoronaVac	B06	10	ND	ND	10	ND	ND	0.073	Negative	0.415	Negative	Negative		-	-	-	-	-	-	-	-	-	-	-	-		A2	10	ND	ND	10	ND	ND	0.068	Negative	5.17	Positive	Negative
SOTR	39	F	kidney	BNT162b2	B07	10	ND	ND	10	ND	ND	0.075	Negative	0.4	Negative	Negative		G4	10	ND	ND	10	ND	ND	0.072	Negative	0.4	Negative	Negative		-	-	-	-	-	-	-	-	-	-	-	-
SOTR	55	M	liver	BNT162b2	B08	177.6	95.89 to 331.8	0.8662	10	ND	ND	0.074	Negative	176.8	Positive	Positive		-	-	-	-	-	-	-	-	-	-	-	-		-	-	-	-	-	-	-	-	-	-	-	-
SOTR	42	F	pancreas + kidney	BNT162b2	B09	92.16	52.25 to 155.6	0.8966	10	ND	ND	0.085	Negative	68.52	Positive	Negative		F10	1972	1694 to 2304	0.9888	339.4	269.1 to 439.2	0.9831	0.076	Negative	2500	Positive	Positive		-	-	-	-	-	-	-	-	-	-	-	-
SOTR	60	M	liver	BNT162b2	B10	80.46	50.02 to 127.2	0.9138	10	ND	ND	0.076	Negative	48.51	Positive	Positive		G3	11935	11598 to 12291	0.9994	8539	7277 to 10149	0.9923	2.26	Positive	2500	Positive	Positive		-	-	-	-	-	-	-	-	-	-	-	-
SOTR	42	M	pancreas + kidney	BNT162b2	C01	23.93	9.542 to 44.98	0.8452	10.62	8.804 to 12.33	0.9615	0.075	Negative	0.4	Negative	Negative		F5	10	ND	ND	10	ND	ND	0.075	Negative	0.4	Negative	Negative		B2	10	ND	ND	10	ND	ND	0.071	Negative	0.4	Negative	Negative
SOTR	64	M	liver	BNT162b2	C02	738.2	490.6 to 1115	0.9425	12.47	10.06 to 14.90	0.9878	0.076	Negative	225.6	Positive	Positive		F9	2194	2095 to 2297	0.9994	651	486.2 to 886.0	0.9555	0.066	Negative	2500	Positive	Positive		C2	7620	6676 to 8674	0.9929	1134	1102 to 1167	0.9998	0.073	Negative	2500	Positive	Positive
SOTR	65	F	single-loung	CoronaVac	C03	10	ND	ND	10	ND	ND	0.072	Negative	0.4	Negative	Negative		F4	10	ND	ND	10	ND	ND	0.07	Negative	0.4	Negative	Negative		B3	10	ND	ND	10	ND	ND	0.076	Negative	0.4	Negative	Negative
SOTR	31	M	pancreas + kidney	BNT162b2	C04	150.1	103.4 to 219.0	0.9474	10	ND	ND	0.072	Negative	229.1	Positive	Negative		G6	2229	2008 to 2474	0.9934	1973	1138 to 3418	0.8777	0.074	Negative	2500	Positive	Positive		C9	2258	2213 to 2301	0.9998	1550	1481 to 1621	0.9994	0.076	Negative	2500	Positive	Positive
SOTR	66	M	single-loung	CoronaVac	C05	10	ND	ND	10	ND	ND	0.075	Negative	0.4	Negative	Negative		-	-	-	-	-	-	-	-	-	-	-	-		-	-	-	-	-	-	-	-	-	-	-	-
SOTR	65	M	single-loung	CoronaVac	C06	134.2	102.5 to 175.8	0.9695	10	ND	ND	0.425	Negative	2.68	Positive	Negative		F3	280.6	213.3 to 372.4	0.9699	62.04	42.37 to 88.19	0.9169	0.072	Negative	19.15	Positive	Positive		A1	370.9	280.0 to 495.1	0.9698	106.2	63.80 to 175.8	0.8928	0.076	Negative	5.11	Positive	Positive
SOTR	42	M	liver	CoronaVac	C07	10	ND	ND	10	ND	ND	0.102	Negative	2.99	Positive	Negative		-	-	-	-	-	-	-	-	-	-	-	-		C5	1299	1247 to 1354	0.9992	284.4	274.4 to 296.6	0.999	0.101	Negative	2500	Positive	Positive
SOTR	67	M	single-loung	CoronaVac	C08	10	ND	ND	10	ND	ND	0.093	Negative	0.43	Negative	Negative		-	-	-	-	-	-	-	-	-	-	-	-		-	-	-	-	-	-	-	-	-	-	-	-
SOTR	53	M	pancreas + kidney	BNT162b2	C09	10	ND	ND	10	ND	ND	0.072	Negative	0.4	Negative	Negative		-	-	-	-	-	-	-	-	-	-	-	-		C1	10	ND	ND	10	ND	ND	0.077	Negative	15.44	Positive	Negative
SOTR	54	F	kidney	BNT162b2	C10	17.44	13.47 to 21.61	0.9301	10	ND	ND	0.075	Negative	0.4	Negative	Negative		-	-	-	-	-	-	-	-	-	-	-	-		-	-	-	-	-	-	-	-	-	-	-	-
SOTR	52	M	double-lung	CoronaVac	D01	10	ND	ND	10	ND	ND	0.071	Negative	0.716	Negative	Negative		-	-	-	-	-	-	-	-	-	-	-	-		A6	466.7	338.3 to 648.2	0.9629	99.7	58.63 to 165.9	0.8976	0.077	Negative	796.6	Positive	Positive
SOTR	58	M	liver	BNT162b2	D02	10	ND	ND	10	ND	ND	0.078	Negative	0.4	Negative	Negative		E7	10	ND	ND	10	ND	ND	0.079	Negative	0.4	Negative	Negative		-	-	-	-	-	-	-	-	-	-	-	-
SOTR	37	F	kidney	CoronaVac	D04	16.83	6.519 to 31.23	0.8544	17.7	6.737 to 34.09	0.8754	0.073	Negative	0.4	Negative	Negative		G1	84.36	36.39 to 175.4	0.8337	25.45	15.63 to 37.91	0.8985	0.075	Negative	0.4	Negative	Negative		-	-	-	-	-	-	-	-	-	-	-	-
SOTR	57	M	liver	CoronaVac	D05	10	ND	ND	10	ND	ND	0.114	Negative	0.695	Negative	Negative		-	-	-	-	-	-	-	-	-	-	-	-		-	-	-	-	-	-	-	-	-	-	-	-
SOTR	32	M	pancreas + kidney	BNT162b2	D06	10	ND	ND	10	ND	ND	0.075	Negative	6.75	Positive	Negative		G5	5978	5640 to 6362	0.9945	1854	1767 to 1943	0.9992	0.075	Negative	2500	Positive	Positive		-	-	-	-	-	-	-	-	-	-	-	-
SOTR	63	M	single-loung	CoronaVac	D07	10	ND	ND	10	ND	ND	0.073	Negative	0.4	Negative	Negative		E8	10	ND	ND	10	ND	ND	0.073	Negative	0.4	Negative	Negative		-	-	-	-	-	-	-	-	-	-	-	-
SOTR	69	F	double-lung	CoronaVac	D08	55.66	30.88 to 92.56	0.9123	10	ND	ND	0.117	Negative	16.93	Positive	Negative		F1	2429	2315 to 2550	0.999	1593	1403 to 1801	0.9942	0.083	Negative	2500	Positive	Positive		B4	6220	5937 to 6508	0.9974	5593	5110 to 6107	0.9926	0.08	Negative	2500	Positive	Positive
SOTR	22	F	kidney	CoronaVac	D09	10	ND	ND	10	ND	ND	0.098	Negative	0.887	Positive	Negative		-	-	-	-	-	-	-	-	-	-	-	-		-	-	-	-	-	-	-	-	-	-	-	-
SOTR	62	M	double-lung	CoronaVac	D10	10	ND	ND	10	ND	ND	0.111	Negative	0.4	Negative	Negative		-	-	-	-	-	-	-	-	-	-	-	-		B1	10		ND	10	ND	ND	0.119	Negative	0.4	Negative	Negative
SOTR	37	F	double-lung	BNT162b2	E01	10	ND	ND	10	ND	ND	0.354	Negative	0.4	Negative	Negative		-	-	-	-	-	-	-	-	-	-	-	-		C6	10	ND	ND	10	ND	ND	0.458	Negative	0.4	Negative	Negative
SOTR	68	M	single-loung	CoronaVac	E02	10	ND	ND	10	ND	ND	0.072	Negative	0.4	Negative	Negative		-	-	-	-	-	-	-	-	-	-	-	-		C3	10	ND	ND	10	ND	ND	0.079	Negative	0.4	Negative	Negative
SOTR	54	M	kidney	CoronaVac	E03	10	ND	ND	10	ND	ND	0.07	Negative	0.79	Negative	Negative		-	-	-	-	-	-	-	-	-	-	-	-		-	-	-	-	-	-	-	-	-	-	-	-
SOTR	39	M	double-lung	BNT162b2	E04	11.52	4.761 to 20.70	0.881	10	ND	ND	0.065	Negative	0.4	Negative	Negative		-	-	-	-	-	-	-	-	-	-	-	-		B6	130.2	97.44 to 173.4	0.9657	29.75	23.26 to 37.40	0.9608	0.078	Negative	0.4	Negative	Negative
SOTR	41	F	pancreas + kidney	BNT162b2	E05	10	ND	ND	10	ND	ND	0.079	Negative	1.98	Positive	Negative		-	-	-	-	-	-	-	-	-	-	-	-		-	-	-	-	-	-	-	-	-	-	-	-
SOTR	34	F	pancreas + kidney	CoronaVac	E06	10	ND	ND	10	ND	ND	0.074	Negative	0.4	Negative	Negative		-	-	-	-	-	-	-	-	-	-	-	-		-	-	-	-	-	-	-	-	-	-	-	-
Healthy	55	F	NA	CoronaVac	F10	204.2	133.1 to 317.8	0.9304	10	ND	ND	2.21	Positive	153.1	Positive	Negative
Healthy	38	F	NA	CoronaVac	G1	2246	1651 to 3059	0.9596	31.42	18.63 to 55.45	0.8371	4.94	Positive	282.101	Positive	Positive
Healthy	45	F	NA	CoronaVac	G2	107.3	78.39 to 147.8	0.9567	10	ND	ND	1.24	Positive	97.22	Positive	Positive
Healthy	63	F	NA	CoronaVac	G4	63.39	48.34 to 83.12	0.9598	10	ND	ND	1.64	Positive	36.54	Positive	Negative
Healthy	55	F	NA	CoronaVac	G9	118.9	56.79 to 243.2	0.8446	10	ND	ND	1.55	Positive	61.04	Positive	Negative
Healthy	50	F	NA	CoronaVac	G10	30.62	22.94 to 40.12	0.9454	10	ND	ND	1.57	Positive	39.89	Positive	Negative
Healthy	63	F	NA	CoronaVac	H1	103.9	75.16 to 145.4	0.9508	10	ND	ND	1.5	Positive	38.7	Positive	Negative
Healthy	30	F	NA	CoronaVac	H3	116.9	89.50 to 153.0	0.9676	10	ND	ND	2.48	Positive	25.65	Positive	Negative
Healthy	60	F	NA	CoronaVac	H6	75.09	52.97 to 106.2	0.9424	28.04	10.20 to 57.84	0.8567	0.322	Negative	63.04	Positive	Negative
Healthy	48	F	NA	CoronaVac	H7	300.2	188.1 to 484.0	0.9265	10	ND	ND	1.6	Positive	216.8	Positive	Negative
Healthy	67	F	NA	CoronaVac	H9	44.5	29.64 to 67.08	0.8998	10	ND	ND	6.33	Positive	82.16	Positive	Negative
Healthy	26	F	NA	CoronaVac	I2	1864	1609 to 2157	0.9891	134.9	96.90 to 191.4	0.9506	111.8	Positive	1516	Positive	Positive
Healthy	60	F	NA	CoronaVac	I3	111.4	64.82 to 192.7	0.8864	10	ND	ND	5.7	Positive	104.1	Positive	Negative
Healthy	31	F	NA	BNT162b2	G3	830.2	652.7 to 1064	0.9766	50.77	31.42 to 90.90	0.8436	0.096	Negative	1221	Positive	Positive
Healthy	47	F	NA	BNT162b2	G4	622.3	479.0 to 813.0	0.9746	28.94	25.10 to 33.41	0.9795	0.07	Negative	407.5	Positive	Positive
Healthy	51	F	NA	BNT162b2	G5	519	485.0 to 555.7	0.998	66.07	40.53 to 112.8	0.8715	0.116	Negative	1276.2	Positive	Positive
Healthy	52	F	NA	BNT162b2	G8	382	291.5 to 503.0	0.973	62.68	30.16 to 117.8	0.8418	0.073	Negative	709.1	Positive	Positive
Healthy	29	F	NA	BNT162b2	G9	1808	1638 to 2007	0.9967	713.7	652.6 to 778.6	0.9971	0.078	Negative	2500	Positive	Positive
Healthy	32	F	NA	BNT162b2	G10	699.6	680.3 to 719.5	0.9997	224.6	110.0 to 469.5	0.8366	0.07	Negative	2387	Positive	Positive
Healthy	28	F	NA	BNT162b2	H1	1710	1478 to 1982	0.9896	264.2	159.2 to 455.6	0.9021	0.073	Negative	2500	Positive	Positive
Healthy	25	F	NA	BNT162b2	H4	734.5	688.3 to 783.5	0.9972	50.55	47.56 to 53.79	0.9981	0.072	Negative	1611	Positive	Positive
Healthy	38	F	NA	BNT162b2	H5	843.5	645.1 to 1110	0.9839	72.4	71.11 to 73.72	0.9999	0.121	Negative	1234	Positive	Positive
Healthy	34	F	NA	BNT162b2	H6	188.7	148.8 to 240.0	0.9721	29.52	15.53 to 52.15	0.8179	0.064	Negative	593	Positive	Positive
Healthy	48	F	NA	BNT162b2	H7	409.7	382.0 to 440.2	0.9981	22.75	11.83 to 37.13	0.8911	0.077	Negative	729.7	Positive	Positive
Healthy	46	F	NA	BNT162b2	H8	354	326.6 to 385.0	0.9972	22.39	14.76 to 32.04	0.8849	0.073	Negative	531.6	Positive	Positive
Healthy	36	F	NA	BNT162b2	H10	2360	1930 to 2882	0.981	208.3	139.0 to 322.1	0.931	0.076	Negative	1605	Positive	Positive
Healthy	25	F	NA	BNT162b2	I1	1570	1189 to 2067	0.9682	112.7	84.89 to 151.1	0.9518	0.074	Negative	1968	Positive	Positive
Healthy	24	F	NA	BNT162b2	I2	962.5	764.7 to 1224	0.9812	64.74	54.56 to 77.06	0.9798	0.069	Negative	1196	Positive	Positive
Healthy	25	F	NA	BNT162b2	I3	1482	1337 to 1647	0.9951	112.1	70.41 to 184.5	0.9041	0.072	Negative	2500	Positive	Positive
Healthy	38	F	NA	BNT162b2	I4	1510	1170 to 1953	0.9735	81.74	65.92 to 101.9	0.9726	0.072	Negative	781.1	Positive	Positive
Healthy	44	M	NA	CoronaVac	F9	45.85	24.70 to 79.21	0.8366	10	ND	ND	0.731	Negative	15.29	Positive	Negative
Healthy	70	M	NA	CoronaVac	G8	48.8	31.62 to 72.71	0.9195	10	ND	ND	0.121	Negative	25.3	Positive	Negative
Healthy	49	M	NA	CoronaVac	H2	10	ND	ND	10	ND	ND	0.234	Negative	13.13	Positive	Negative
Healthy	55	M	NA	CoronaVac	H4	353.1	241.7 to 520.0	0.9493	10	ND	ND	0.5	Negative	67.28	Positive	Positive
Healthy	41	M	NA	BNT162b2	G6	555.1	507.2 to 607.7	0.9962	38.39	31.67 to 46.77	0.9715	0.066	Negative	1059	Positive	Positive
Healthy	36	M	NA	BNT162b2	G7	2584	2293 to 2913	0.9921	495.6	454.7 to 540.1	0.9979	0.302	Negative	2500	Positive	Positive
Healthy	47	M	NA	BNT162b2	H2	862.7	779.1 to 959.4	0.9956	147.3	66.06 to 325.1	0.845	0.164	Negative	1157	Positive	Positive
Healthy	28	M	NA	BNT162b2	H3	2738	2641 to 2845	0.9992	317.4	251.2 to 403.8	0.977	0.074	Negative	2500	Positive	Positive
Healthy	38	M	NA	BNT162b2	I6	1278	986.2 to 1659	0.9733	272	255.5 to 289.4	0.9984	0.067	Negative	1005	Positive	Positive
Healthy	55	M	NA	BNT162b2	I7	366	247.3 to 549.9	0.945	18.44	10.36 to 28.25	0.9031	0.076	Negative	878.2	Positive	Positive
Healthy	34	M	NA	BNT162b2	I8	452.5	309.7 to 669.6	0.949	185.8	158.3 to 218.4	0.9879	0.074	Negative	511.4	Positive	Positive
Healthy	51	F	NA	CoronaVac	G3	474.2	349.1 to 647.8	0.9665	10	ND	ND	-	-	-	-	-
Healthy	31	F	NA	CoronaVac	G6	197.5	148.1 to 264.0	0.968	10	ND	ND	-	-	-	-	-
Healthy	43	F	NA	CoronaVac	H5	236.7	144.8 to 394.3	0.9126	10	ND	ND	-	-	-	-	-
Healthy	28	F	NA	CoronaVac	H10	90.56	69.89 to 118.4	0.9638	10	ND	ND	-	-	-	-	-
Healthy	27	F	NA	CoronaVac	I1	228.7	136.4 to 388.9	0.9072	10	ND	ND	-	-	-	-	-
Healthy	27	F	NA	BNT162b2	I5	1437	1235 to 1671	0.9898	130.7	99.14 to 173.3	0.9643	-	-	-	-	-
Healthy	30	M	NA	CoronaVac	G5	92.46	56.34 to 150.7	0.9012	10	ND	ND	-	-	-	-	-
Healthy	47	M	NA	CoronaVac	G7	168.9	123.5 to 235.2	0.9603	10	ND	ND	-	-	-	-	-
Healthy	37	M	NA	CoronaVac	H8	10	ND	ND	10	ND	ND	-	-	-	-	-
